# Supplementary material for: [Retracted] Dysregulated Circulating Apoptosis‐ and Autophagy‐Related lncRNAs as Diagnostic Markers in Coronary Artery Disease
Source: Hindawi journal article supplement (doi:10.1155/2021/5517786), 2021-01-01
Supplement: f1 [file 5517786.f1.pdf]

Supplementary table 1. Correlation analysis between 13 abnormally expressed circulating lncRNAs and autophagy- and apoptosis-related mRNAs.

| mRNA      | lncRNA     | R            | p_value |
|-----------|------------|--------------|---------|
| JUN       | LOC338758  | 0.643690128  | 0       |
| ATG2B     | AC004485.3 | -0.714231677 | 0       |
| CAPN2     | AC004485.3 | -0.76918051  | 0       |
| CASP8     | AC004485.3 | -0.72073522  | 0       |
| CTSW      | AC004485.3 | -0.364477733 | 0       |
| DFFB      | AC004485.3 | -0.593567757 | 0       |
| FASLG     | AC004485.3 | -0.415183409 | 0       |
| GABARAPL1 | AC004485.3 | -0.443660749 | 0       |
| GZMB      | AC004485.3 | -0.486368377 | 0       |
| HIF1A     | AC004485.3 | -0.563083389 | 0       |
| ITPR3     | AC004485.3 | -0.656598114 | 0       |
| LMNA      | AC004485.3 | -0.502658644 | 0       |
| MAPK9     | AC004485.3 | -0.745011154 | 0       |
| MTMR4     | AC004485.3 | -0.631630655 | 0       |
| NGF       | AC004485.3 | 0.662900828  | 0       |
| PIK3R2    | AC004485.3 | 0.768292974  | 0       |
| PPP2CA    | AC004485.3 | -0.650676322 | 0       |
| PRF1      | AC004485.3 | -0.516450823 | 0       |
| PRKACA    | AC004485.3 | 0.561247005  | 0       |
| RRAGB     | AC004485.3 | -0.562181803 | 0       |
| RRAS2     | AC004485.3 | -0.739352734 | 0       |
| TP53AIP1  | AC004485.3 | -0.521547304 | 0       |
| ATG2B     | AC004920.3 | -0.688260003 | 0       |
| CAPN2     | AC004920.3 | -0.721874207 | 0       |
| CASP8     | AC004920.3 | -0.710170788 | 0       |
| DFFB      | AC004920.3 | -0.633065095 | 0       |
| FASLG     | AC004920.3 | -0.373966601 | 0       |
| GABARAPL1 | AC004920.3 | -0.438209719 | 0       |
| GZMB      | AC004920.3 | -0.465630346 | 0       |
| HIF1A     | AC004920.3 | -0.610751448 | 0       |
| ITPR3     | AC004920.3 | -0.752279036 | 0       |
| LMNA      | AC004920.3 | -0.439572573 | 0       |
| MAPK9     | AC004920.3 | -0.798566976 | 0       |
| MTMR4     | AC004920.3 | -0.636697344 | 0       |
| NGF       | AC004920.3 | 0.724603621  | 0       |
| PIK3R2    | AC004920.3 | 0.818610525  | 0       |
| PPP2CA    | AC004920.3 | -0.669118796 | 0       |
| PRF1      | AC004920.3 | -0.498376807 | 0       |
| PRKACA    | AC004920.3 | 0.612546221  | 0       |
| RRAGB     | AC004920.3 | -0.642825546 | 0       |
| RRAS2     | AC004920.3 | -0.771131412 | 0       |
| TP53AIP1  | AC004920.3 | -0.651868648 | 0       |
| TUBA8     | AC004920.3 | 0.505828418  | 0       |
| ATG2B     | AJ006998.2 | -0.609649519 | 0       |
| CAPN2     | AJ006998.2 | -0.592961077 | 0       |
| CASP8     | AJ006998.2 | -0.542745004 | 0       |
| DFFB      | AJ006998.2 | -0.534157073 | 0       |
| GZMB      | AJ006998.2 | -0.420621945 | 0       |

|           |               |              |   |
|-----------|---------------|--------------|---|
| HIF1A     | AJ006998.2    | -0.396528308 | 0 |
| ITPR3     | AJ006998.2    | -0.569730595 | 0 |
| LMNA      | AJ006998.2    | -0.368073761 | 0 |
| MAPK9     | AJ006998.2    | -0.596054248 | 0 |
| MTMR4     | AJ006998.2    | -0.61642796  | 0 |
| NGF       | AJ006998.2    | 0.452186364  | 0 |
| PIK3R2    | AJ006998.2    | 0.636365577  | 0 |
| PPP2CA    | AJ006998.2    | -0.436689452 | 0 |
| PRF1      | AJ006998.2    | -0.418019036 | 0 |
| PRKACA    | AJ006998.2    | 0.405736603  | 0 |
| RRAGB     | AJ006998.2    | -0.446148941 | 0 |
| RRAS2     | AJ006998.2    | -0.654368264 | 0 |
| ATG2B     | H19           | -0.523048677 | 0 |
| CAPN2     | H19           | -0.57130901  | 0 |
| CASP8     | H19           | -0.523031775 | 0 |
| DFFB      | H19           | -0.48440924  | 0 |
| HIF1A     | H19           | -0.481877785 | 0 |
| ITPR3     | H19           | -0.550040544 | 0 |
| MAPK9     | H19           | -0.605167061 | 0 |
| MTMR4     | H19           | -0.56230443  | 0 |
| NGF       | H19           | 0.631124183  | 0 |
| PIK3R2    | H19           | 0.595441488  | 0 |
| PPP2CA    | H19           | -0.558499489 | 0 |
| PRKACA    | H19           | 0.56258483   | 0 |
| RRAGB     | H19           | -0.471630707 | 0 |
| RRAS2     | H19           | -0.609785871 | 0 |
| TP53AIP1  | H19           | -0.475810625 | 0 |
| TUBA8     | H19           | 0.565251441  | 0 |
| ATG2B     | RP11-247A12.1 | -0.724252526 | 0 |
| CAPN2     | RP11-247A12.1 | -0.756851286 | 0 |
| CASP8     | RP11-247A12.1 | -0.758297941 | 0 |
| DFFB      | RP11-247A12.1 | -0.652251056 | 0 |
| FASLG     | RP11-247A12.1 | -0.360574151 | 0 |
| GABARAPL1 | RP11-247A12.1 | -0.476498324 | 0 |
| GZMB      | RP11-247A12.1 | -0.454048449 | 0 |
| HIF1A     | RP11-247A12.1 | -0.609837751 | 0 |
| ITPR3     | RP11-247A12.1 | -0.718271301 | 0 |
| LMNA      | RP11-247A12.1 | -0.50437172  | 0 |
| MAPK9     | RP11-247A12.1 | -0.774473814 | 0 |
| MTMR4     | RP11-247A12.1 | -0.710165171 | 0 |
| NGF       | RP11-247A12.1 | 0.664084346  | 0 |
| PIK3R2    | RP11-247A12.1 | 0.815409126  | 0 |
| PPP2CA    | RP11-247A12.1 | -0.663401742 | 0 |
| PRF1      | RP11-247A12.1 | -0.430337299 | 0 |
| PRKACA    | RP11-247A12.1 | 0.551277296  | 0 |
| RRAGB     | RP11-247A12.1 | -0.60776178  | 0 |
| RRAS2     | RP11-247A12.1 | -0.799014101 | 0 |
| TP53AIP1  | RP11-247A12.1 | -0.526058159 | 0 |
| TUBA8     | RP11-247A12.1 | 0.395718839  | 0 |
| ATG2B     | RP11-288L9.4  | -0.705848887 | 0 |
| CAPN2     | RP11-288L9.4  | -0.715825568 | 0 |
| CASP8     | RP11-288L9.4  | -0.715740472 | 0 |
| DFFB      | RP11-288L9.4  | -0.658287092 | 0 |

|           |              |              |   |
|-----------|--------------|--------------|---|
| FASLG     | RP11-288L9.4 | -0.418381499 | 0 |
| GABARAPL1 | RP11-288L9.4 | -0.496516538 | 0 |
| GZMB      | RP11-288L9.4 | -0.474409434 | 0 |
| HIF1A     | RP11-288L9.4 | -0.611715213 | 0 |
| ITPR3     | RP11-288L9.4 | -0.769711436 | 0 |
| LMNA      | RP11-288L9.4 | -0.50247981  | 0 |
| MAPK9     | RP11-288L9.4 | -0.806351045 | 0 |
| MTMR4     | RP11-288L9.4 | -0.696432112 | 0 |
| NGF       | RP11-288L9.4 | 0.70957459   | 0 |
| PIK3R2    | RP11-288L9.4 | 0.81513824   | 0 |
| PPP2CA    | RP11-288L9.4 | -0.654867579 | 0 |
| PRF1      | RP11-288L9.4 | -0.487506303 | 0 |
| PRKACA    | RP11-288L9.4 | 0.619739302  | 0 |
| RRAGB     | RP11-288L9.4 | -0.63730659  | 0 |
| RRAS2     | RP11-288L9.4 | -0.810907349 | 0 |
| TP53AIP1  | RP11-288L9.4 | -0.607537801 | 0 |
| TUBA8     | RP11-288L9.4 | 0.509344093  | 0 |
| ATG2B     | RP11-344B5.2 | -0.460379141 | 0 |
| CASP8     | RP11-344B5.2 | -0.392321913 | 0 |
| CTSW      | RP11-344B5.2 | -0.405232341 | 0 |
| DFFB      | RP11-344B5.2 | -0.329743898 | 0 |
| FASLG     | RP11-344B5.2 | -0.503169988 | 0 |
| GABARAPL1 | RP11-344B5.2 | -0.428652988 | 0 |
| GZMB      | RP11-344B5.2 | -0.473743061 | 0 |
| HIF1A     | RP11-344B5.2 | -0.397383082 | 0 |
| ITPR3     | RP11-344B5.2 | -0.56554535  | 0 |
| LMNA      | RP11-344B5.2 | -0.460253585 | 0 |
| MAPK9     | RP11-344B5.2 | -0.522671108 | 0 |
| MTMR4     | RP11-344B5.2 | -0.390090218 | 0 |
| NGF       | RP11-344B5.2 | 0.344660193  | 0 |
| PIK3R2    | RP11-344B5.2 | 0.416742812  | 0 |
| PRF1      | RP11-344B5.2 | -0.492678377 | 0 |
| PRKACA    | RP11-344B5.2 | 0.66164537   | 0 |
| RRAS2     | RP11-344B5.2 | -0.552714436 | 0 |
| TNFSF10   | RP11-344B5.2 | 0.496968227  | 0 |
| TP53AIP1  | RP11-344B5.2 | -0.461966995 | 0 |
| ATG2B     | RP11-452C8.1 | -0.645894435 | 0 |
| CAPN2     | RP11-452C8.1 | -0.681581574 | 0 |
| CASP8     | RP11-452C8.1 | -0.716682982 | 0 |
| DFFB      | RP11-452C8.1 | -0.581870864 | 0 |
| FASLG     | RP11-452C8.1 | -0.399460761 | 0 |
| GABARAPL1 | RP11-452C8.1 | -0.489316978 | 0 |
| GZMB      | RP11-452C8.1 | -0.428522585 | 0 |
| HIF1A     | RP11-452C8.1 | -0.669277683 | 0 |
| ITPR3     | RP11-452C8.1 | -0.724536901 | 0 |
| LMNA      | RP11-452C8.1 | -0.509214945 | 0 |
| MAPK9     | RP11-452C8.1 | -0.721031571 | 0 |
| MTMR4     | RP11-452C8.1 | -0.712576018 | 0 |
| NGF       | RP11-452C8.1 | 0.803859033  | 0 |
| PIK3R2    | RP11-452C8.1 | 0.761516347  | 0 |
| PPP2CA    | RP11-452C8.1 | -0.649578067 | 0 |
| PRF1      | RP11-452C8.1 | -0.466460217 | 0 |
| PRKACA    | RP11-452C8.1 | 0.541979954  | 0 |

|           |               |              |   |
|-----------|---------------|--------------|---|
| RRAGB     | RP11-452C8.1  | -0.517992179 | 0 |
| RRAS2     | RP11-452C8.1  | -0.72443085  | 0 |
| TP53AIP1  | RP11-452C8.1  | -0.645700832 | 0 |
| TUBA8     | RP11-452C8.1  | 0.440102905  | 0 |
| ATG2B     | RP11-565A3.1  | -0.611636319 | 0 |
| CAPN2     | RP11-565A3.1  | -0.683781069 | 0 |
| CASP8     | RP11-565A3.1  | -0.710291929 | 0 |
| DFFB      | RP11-565A3.1  | -0.650107085 | 0 |
| FASLG     | RP11-565A3.1  | -0.351164886 | 0 |
| GABARAPL1 | RP11-565A3.1  | -0.555179887 | 0 |
| GZMB      | RP11-565A3.1  | -0.392944413 | 0 |
| HIF1A     | RP11-565A3.1  | -0.70518681  | 0 |
| ITPR3     | RP11-565A3.1  | -0.699034454 | 0 |
| LMNA      | RP11-565A3.1  | -0.471003829 | 0 |
| MAPK9     | RP11-565A3.1  | -0.676422968 | 0 |
| MTMR4     | RP11-565A3.1  | -0.673408812 | 0 |
| NGF       | RP11-565A3.1  | 0.654996891  | 0 |
| PIK3R2    | RP11-565A3.1  | 0.682182791  | 0 |
| PPP2CA    | RP11-565A3.1  | -0.63873464  | 0 |
| PRF1      | RP11-565A3.1  | -0.406999018 | 0 |
| PRKACA    | RP11-565A3.1  | 0.506184337  | 0 |
| RRAGB     | RP11-565A3.1  | -0.41712718  | 0 |
| RRAS2     | RP11-565A3.1  | -0.675951754 | 0 |
| TP53AIP1  | RP11-565A3.1  | -0.49757339  | 0 |
| TUBA8     | RP11-565A3.1  | 0.39388403   | 0 |
| ATG2B     | RP5-1114G22.2 | -0.518240822 | 0 |
| CAPN2     | RP5-1114G22.2 | -0.514009117 | 0 |
| CASP8     | RP5-1114G22.2 | -0.438199549 | 0 |
| FASLG     | RP5-1114G22.2 | -0.372718776 | 0 |
| GZMB      | RP5-1114G22.2 | -0.449264027 | 0 |
| ITPR3     | RP5-1114G22.2 | -0.453024173 | 0 |
| MAPK9     | RP5-1114G22.2 | -0.508561355 | 0 |
| MTMR4     | RP5-1114G22.2 | -0.382685837 | 0 |
| NGF       | RP5-1114G22.2 | 0.77637448   | 0 |
| PIK3R2    | RP5-1114G22.2 | 0.624109746  | 0 |
| PPP2CA    | RP5-1114G22.2 | -0.492166801 | 0 |
| PRF1      | RP5-1114G22.2 | -0.457756187 | 0 |
| PRKACA    | RP5-1114G22.2 | 0.414905801  | 0 |
| RRAGB     | RP5-1114G22.2 | -0.489792239 | 0 |
| RRAS2     | RP5-1114G22.2 | -0.469266211 | 0 |
| TP53AIP1  | RP5-1114G22.2 | -0.474637893 | 0 |
| TUBA8     | RP5-1114G22.2 | 0.354884809  | 0 |
| ATG2B     | RP5-902P8.10  | -0.691715205 | 0 |
| CAPN2     | RP5-902P8.10  | -0.712738621 | 0 |
| CASP8     | RP5-902P8.10  | -0.687142786 | 0 |
| DFFB      | RP5-902P8.10  | -0.596176418 | 0 |
| FASLG     | RP5-902P8.10  | -0.416853214 | 0 |
| GABARAPL1 | RP5-902P8.10  | -0.447481617 | 0 |
| GZMB      | RP5-902P8.10  | -0.467250519 | 0 |
| HIF1A     | RP5-902P8.10  | -0.648973781 | 0 |
| ITPR3     | RP5-902P8.10  | -0.692270043 | 0 |
| LMNA      | RP5-902P8.10  | -0.416636821 | 0 |
| MAPK9     | RP5-902P8.10  | -0.741665855 | 0 |

|           |                |              |      |
|-----------|----------------|--------------|------|
| MTMR4     | RP5-902P8.10   | -0.66855444  | 0    |
| NGF       | RP5-902P8.10   | 0.828633737  | 0    |
| PIK3R2    | RP5-902P8.10   | 0.764697781  | 0    |
| PPP2CA    | RP5-902P8.10   | -0.695533011 | 0    |
| PRF1      | RP5-902P8.10   | -0.502474263 | 0    |
| PRKACA    | RP5-902P8.10   | 0.618962852  | 0    |
| RRAGB     | RP5-902P8.10   | -0.567677771 | 0    |
| RRAS2     | RP5-902P8.10   | -0.721221996 | 0    |
| TP53AIP1  | RP5-902P8.10   | -0.575666442 | 0    |
| TUBA8     | RP5-902P8.10   | 0.474592708  | 0    |
| ATG2B     | XXbac-B33L19.4 | -0.688483755 | 0    |
| CAPN2     | XXbac-B33L19.4 | -0.746887695 | 0    |
| CASP8     | XXbac-B33L19.4 | -0.768370527 | 0    |
| DFFB      | XXbac-B33L19.4 | -0.654523695 | 0    |
| FASLG     | XXbac-B33L19.4 | -0.415549776 | 0    |
| GABARAPL1 | XXbac-B33L19.4 | -0.546084572 | 0    |
| GZMB      | XXbac-B33L19.4 | -0.407151916 | 0    |
| HIF1A     | XXbac-B33L19.4 | -0.729191812 | 0    |
| ITPR3     | XXbac-B33L19.4 | -0.760657997 | 0    |
| LMNA      | XXbac-B33L19.4 | -0.509668707 | 0    |
| MAPK9     | XXbac-B33L19.4 | -0.792169063 | 0    |
| MTMR4     | XXbac-B33L19.4 | -0.732594202 | 0    |
| NGF       | XXbac-B33L19.4 | 0.740474684  | 0    |
| PIK3R2    | XXbac-B33L19.4 | 0.77226299   | 0    |
| PPP2CA    | XXbac-B33L19.4 | -0.72674128  | 0    |
| PRF1      | XXbac-B33L19.4 | -0.450827048 | 0    |
| PRKACA    | XXbac-B33L19.4 | 0.631100293  | 0    |
| RRAGB     | XXbac-B33L19.4 | -0.561046789 | 0    |
| RRAS2     | XXbac-B33L19.4 | -0.791976923 | 0    |
| TP53AIP1  | XXbac-B33L19.4 | -0.645175924 | 0    |
| TUBA8     | XXbac-B33L19.4 | 0.460721822  | 0    |
| GABARAPL1 | H19            | -0.321124641 | 0.01 |
| LMNA      | H19            | -0.316634238 | 0.01 |
| PRF1      | H19            | -0.307135501 | 0.01 |
| CAPN2     | RP11-344B5.2   | -0.32796016  | 0.01 |
| HIF1A     | RP5-1114G22.2  | -0.324809718 | 0.01 |
| TUBA8     | AC004485.3     | 0.30297661   | 0.02 |
| DFFB      | RP5-1114G22.2  | -0.299083772 | 0.02 |
| TNFSF10   | RP5-902P8.10   | 0.300581802  | 0.02 |
| GABARAPL1 | AJ006998.2     | -0.290637738 | 0.03 |
| TP53AIP1  | AJ006998.2     | -0.290818232 | 0.03 |
| CTSW      | RP11-288L9.4   | -0.290928273 | 0.03 |
| TUBA8     | RP11-344B5.2   | 0.291393559  | 0.03 |
| LMNA      | RP5-1114G22.2  | -0.291080951 | 0.03 |
| ITPR3     | LOC338758      | 0.280827516  | 0.04 |
| PPP2CA    | RP11-344B5.2   | -0.286342891 | 0.04 |
| HIF1A     | LOC338758      | 0.274680685  | 0.06 |
| GZMB      | H19            | -0.273891597 | 0.06 |
| CTSW      | RP5-902P8.10   | -0.272799104 | 0.06 |
| TNFSF10   | XXbac-B33L19.4 | 0.273809213  | 0.06 |
| CTSW      | AC004920.3     | -0.27026871  | 0.07 |
| TNFSF10   | RP11-288L9.4   | 0.268900958  | 0.07 |
| LMNA      | LOC338758      | 0.264152448  | 0.08 |

|           |                |              |      |
|-----------|----------------|--------------|------|
| TUBA8     | AJ006998.2     | 0.263299357  | 0.08 |
| CTSW      | H19            | -0.265829463 | 0.08 |
| GABARAPL1 | LOC338758      | 0.258847306  | 0.1  |
| TNFSF10   | RP5-1114G22.2  | 0.254783528  | 0.11 |
| FASLG     | AJ006998.2     | -0.253566876 | 0.12 |
| TNFSF10   | AC004485.3     | 0.24773392   | 0.14 |
| TP53AIP1  | LOC338758      | 0.242635838  | 0.17 |
| TNFSF10   | AC004920.3     | 0.237471605  | 0.21 |
| CTSW      | AJ006998.2     | -0.236567745 | 0.21 |
| FASLG     | H19            | -0.237238376 | 0.21 |
| CTSW      | RP11-247A12.1  | -0.235285999 | 0.21 |
| TNFSF10   | RP11-452C8.1   | 0.23212235   | 0.21 |
| CTSW      | RP11-565A3.1   | -0.236376752 | 0.21 |
| CTSW      | RP5-1114G22.2  | -0.234569164 | 0.21 |
| CTSW      | XXbac-B33L19.4 | -0.235597725 | 0.21 |
| RRAGB     | RP11-344B5.2   | -0.220360268 | 0.32 |
| PPP2CA    | LOC338758      | 0.209757278  | 0.45 |
| JUN       | RP11-344B5.2   | -0.208086408 | 0.46 |
| TNFSF10   | RP11-565A3.1   | 0.203142449  | 0.53 |
| TNFSF10   | RP11-247A12.1  | 0.200112178  | 0.57 |
| CTSW      | RP11-452C8.1   | -0.199444016 | 0.57 |
| JUN       | RP11-565A3.1   | -0.197623948 | 0.58 |
| GABARAPL1 | RP5-1114G22.2  | -0.192089005 | 0.67 |
| TNFSF10   | H19            | 0.19035533   | 0.69 |
| CAPN2     | LOC338758      | 0.185576796  | 0.77 |
| FASLG     | LOC338758      | 0.184981626  | 0.77 |
| ATG2B     | LOC338758      | 0.084819043  | 1    |
| CASP8     | LOC338758      | 0.125887931  | 1    |
| CTSW      | LOC338758      | 0.022044257  | 1    |
| DFFB      | LOC338758      | 0.00698208   | 1    |
| GZMB      | LOC338758      | 0.157876476  | 1    |
| MAPK9     | LOC338758      | 0.075791863  | 1    |
| MTMR4     | LOC338758      | 0.111951943  | 1    |
| NGF       | LOC338758      | -0.120552217 | 1    |
| PIK3R2    | LOC338758      | -0.079015462 | 1    |
| PRF1      | LOC338758      | 0.079738902  | 1    |
| PRKACA    | LOC338758      | -0.02914328  | 1    |
| RRAGB     | LOC338758      | 0.018118573  | 1    |
| RRAS2     | LOC338758      | 0.134532976  | 1    |
| TNFSF10   | LOC338758      | -0.154210335 | 1    |
| TUBA8     | LOC338758      | -0.147302905 | 1    |
| JUN       | AC004485.3     | -0.163760948 | 1    |
| JUN       | AC004920.3     | -0.081917805 | 1    |
| JUN       | AJ006998.2     | -0.145049123 | 1    |
| TNFSF10   | AJ006998.2     | 0.10523839   | 1    |
| JUN       | H19            | -0.122644924 | 1    |
| JUN       | RP11-247A12.1  | -0.141830429 | 1    |
| JUN       | RP11-288L9.4   | -0.154536275 | 1    |
| JUN       | RP11-452C8.1   | -0.165445141 | 1    |
| JUN       | RP5-1114G22.2  | -0.078452402 | 1    |
| JUN       | RP5-902P8.10   | -0.162091759 | 1    |
| JUN       | XXbac-B33L19.4 | -0.165821912 | 1    |
